# Supplementary material for: The C3d-fused foot-and-mouth disease vaccine platform overcomes maternally-derived antibody interference by inducing a potent adaptive immunity
Source: PubMed Central journal article supplement (PMC9240001; doi:10.1038/s41541-022-00496-8), 2022-06-28
Supplement: 41541_2022_496_MOESM1_ESM.pdf [file 41541_2022_496_MOESM1_ESM.pdf]

**Supplementary Table legends**

**Supplementary Table 1. List of primer sequences for qRT-PCR.**

## **Supplementary Figure legends**

### **Supplementary Figure 1. Detection of the inactivated FMDV (O PA2, O PA2-C3d, A22, and A22-C3d) antigens in serially dilutions using a rapid test kit for type O or type A.**

Structural proteins (SPs) of the purified antigen, expressed by cells infected with the immunostimulatory recombinant FMDV O PA2, O PA2-C3d, A22, and A22-C3d antigens, and confirmed by rapid antigen kits (PBM kits). The images show band formation for the SPs and no band formation for the non-structural proteins (NSPs) of FMDV. **(a-d)** O PA2 **(a)**; O PA2-C3d **(b)**; A22 **(c)**; A22-C3d **(d)**.

### **Supplementary Figure 2. Electron microscopic examination of the inactivated antigen of the immunopotent FMD vaccine strain.**

The virus particle (146S), as characterized by transmission electron microscope (TEM) imaging. **(a-d)** O PA2 **(a)**; O PA2-C3d **(b)**; A22 **(c)**; A22-C3d **(d)**.

### **Supplementary Figure 3. VP1 sequences of the O PA2-C3d and A22-C3d.**

VP1 sequence of the O PA2-C3d and A22-C3d adopted on 1<sup>st</sup> (Sus. 1) and 4<sup>th</sup> (Sus. 4) suspension cell (BHK) passages were aligned using SnapGene. **(a-d)** O PA-C3d nucleotide sequence **(a)**; A22-C3d nucleotide sequence **(b)**; O PA2-C3d amino acid sequence **(c)**; A22-C3d amino acid sequence **(d)**.

### **Supplementary Figure 4. Cellular immune response induced by treatment of O PA2-C3d and A22-C3d on murine peritoneal exudate cells (PECs) and porcine peripheral blood mononuclear cells (PBMCs).**

O PA2-C3d and A22-C3d antigen-specific IFN $\gamma$  secretion were assayed to evaluate cellular immune responses induced by immune-enhancing FMDV antigen using ELISpot assay on

murine PECs and porcine PBMCs. The data were presented as spot forming unit (SFU) of the mean $\pm$ SEM of triplicate measurements (n=3/group). **(a, b)** IFN $\gamma$  secreting cell spot and SFU in murine PECs **(a)**; IFN $\gamma$  secreting cell spot and SFU in porcine PBMCs **(b)**. Statistical analyses were performed using one-way ANOVA followed by Tukey's test. \*\* $p$ <0.01; and \*\*\* $p$ <0.001.

**Supplementary Table 1**

| <b>Target</b> | <b>Forward/Reverse</b> | <b>Sequence (5'- 3')</b> | <b>Length(mer)</b> |
|---------------|------------------------|--------------------------|--------------------|
| IFN $\alpha$  | IFN $\alpha$ F         | CATCTGCTCTCTGGGCTGTG     | 20                 |
|               | IFN $\alpha$ R         | TGAGGGGATCCAAAGTCCCT     | 20                 |
| IFN $\beta$   | IFN $\beta$ F          | TGCAACCACCACAATTCCAGA    | 21                 |
|               | IFN $\beta$ R          | GGTTTCATTCCAGCCAGTGC     | 20                 |
| IFN $\gamma$  | IFN $\gamma$ F         | GCCATTCAAAGGAGCATGGAT    | 21                 |
|               | IFN $\gamma$ R         | CTGATGGCTTTGCGCTGGAT     | 20                 |
| IL-1 $\beta$  | IL-1 $\beta$ F         | AGCCAGTCTTCATTGTTTCAGGT  | 22                 |
|               | IL-1 $\beta$ R         | TCATCTCTTTGGGGCCATCAG    | 21                 |
| IL-17A        | IL-17A F               | CTCGTGAAGGCGGGAATCAT     | 20                 |
|               | IL-17A R               | GGTGTGCTCCGGTTCAAGAT     | 20                 |
| IL-23p19      | IL-23p19 F             | CCATATCCAGTGCGGGGATG     | 20                 |
|               | IL-23p19 R             | AGGCCTTGGTGGATCCTTTG     | 20                 |
| IL-23R        | IL-23R F               | TCCCTCATTGCAAAGCACAA     | 20                 |
|               | IL-23R R               | GCATCTCCTCTTGCAAGCAAAT   | 22                 |
| IL-2          | IL-2 F                 | AAGCTCTGGAGGGAGTGCTA     | 20                 |
|               | IL-2 R                 | CAACAGCAGTTACTGTCTCATCA  | 23                 |
| IL-10         | IL-10 F                | CGGCCAGTGAAGAGTTTCT      | 20                 |
|               | IL-10 R                | TGCCTTCGGCATTACGTCTT     | 20                 |
| TGF $\beta$   | TGF $\beta$ F          | GGCTGTCCTTTGATGTCACC     | 20                 |
|               | TGF $\beta$ R          | GGCCAGAATTGAACCCGT       | 18                 |
| IL-4          | IL-4 F                 | CTCACCTCCCAACTGATCCC     | 20                 |
|               | IL-4 R                 | TGTGTCCGTGGACGAAGTTG     | 20                 |
| IL-6          | IL-6 F                 | CTGCAGTCACAGAACGAGTG     | 20                 |
|               | IL-6 R                 | CGGCATCAATCTCAGGTGCC     | 20                 |

**Supplementary Table 1 (continued)**

| <b>Target</b> | <b>Forward/Reverse</b> | <b>Sequence (5'- 3')</b>  | <b>Length(mer)</b> |
|---------------|------------------------|---------------------------|--------------------|
| CD40          | CD40 F                 | GTCATCAGCACAAATACTGC      | 20                 |
|               | CD40 R                 | CACAAGTGGTGTCTGTTTTTC     | 20                 |
| CD80          | CD80 F                 | TCAGGCATCGTTCAGGTGAC      | 20                 |
|               | CD80 R                 | TGACAGCCAGCACCATTTC       | 20                 |
| CD86          | CD86 F                 | TGGGACTGAGTAACATTCTCTTTGT | 25                 |
|               | CD86 R                 | CCAGCTCATCCAGGCTTAGG      | 20                 |
| MHC Class I   | MHC Class I F          | TGAGCTATTTCTACACCGCCG     | 21                 |
|               | MHC Class I R          | TCGTCCACGTAGCCGACTT       | 19                 |
| MHC Class II  | MHC Class II F         | CTCCAGTGATGCTGGGTCAG      | 20                 |
|               | MHC Class II R         | TGACAGAGTGCCCGTTCTTC      | 20                 |
| CD21          | CD21 F                 | TGCCATGCCTACAAAGCTGA      | 20                 |
|               | CD21 R                 | GTAGTAACCAGGGCGGCATT      | 20                 |
| CD28          | CD28 F                 | TCAAAGGAGTTCCGGGCATC      | 20                 |
|               | CD28 R                 | CTGAAGCAGGCGGGAGTAAT      | 20                 |
| ICOS          | ICOS F                 | GGATGTGCAGCCTTTGTTGT      | 20                 |
|               | ICOS R                 | CAGAGCGTACCAAATTGCGG      | 20                 |
| CTLA-4        | CTLA-4 F               | GAGTATGGGTCTGCAGGCAA      | 20                 |
|               | CTLA-4 R               | ATATGTCGCGGCACAGACTT      | 20                 |
| AHNAK         | AHNAK F                | CACCATCACCGTGA CTGAA      | 20                 |
|               | AHNAK R                | AGTTCGTGCCGTGGAATCTT      | 20                 |
| HPRT          | HPRT F                 | CCCAGCGTCGTGATTAGTGA      | 20                 |
|               | HPRT R                 | GCCGTT CAGTCCTGTCCATA     | 20                 |

**(a) O PA2**

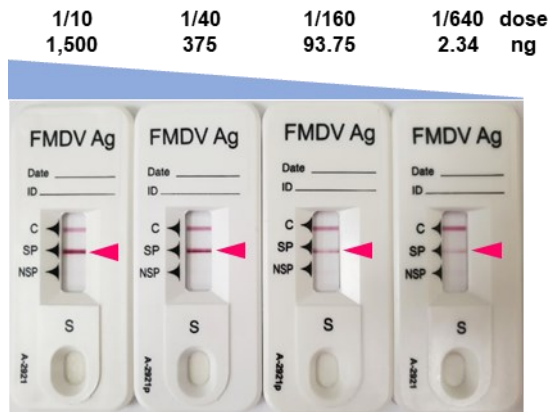

**(b) O PA2-C3d**

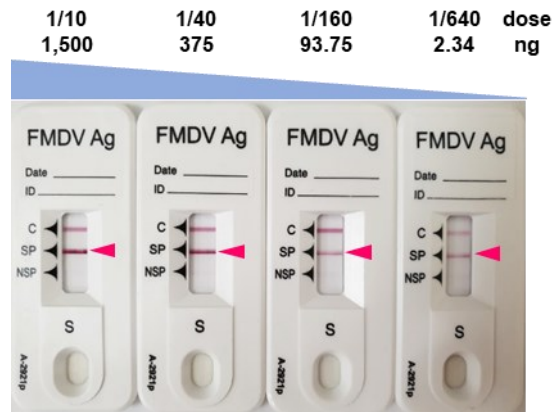

**(c) A22**

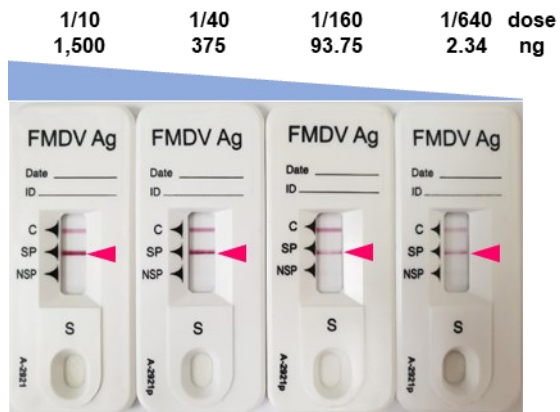

**(d) A22-C3d**

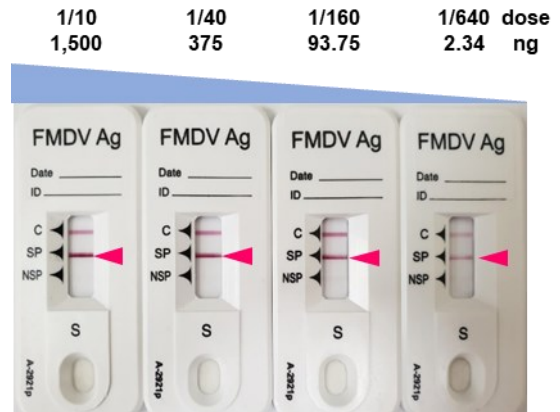

**Supplementary Figure 1**

**(a) O PA2**

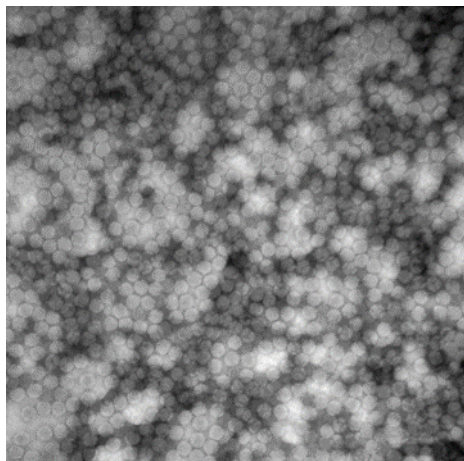

100 nm  
HV=75.0kV  
Direct Mag: 100000x  
AMT Camera System

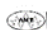

**(b) O PA2-C3d**

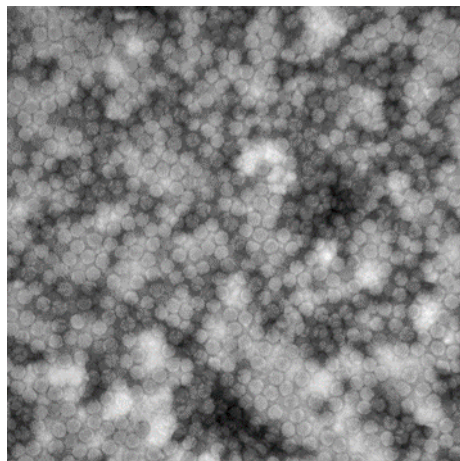

100 nm  
HV=75.0kV  
Direct Mag: 100000x  
AMT Camera System

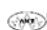

**(c) A22**

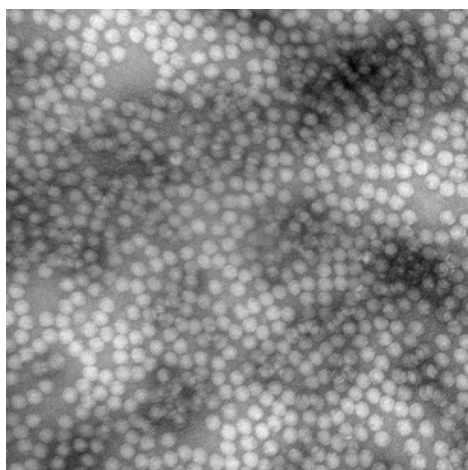

100 nm  
HV=75.0kV  
Direct Mag: 100000x  
AMT Camera System

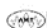

**(d) A22-C3d**

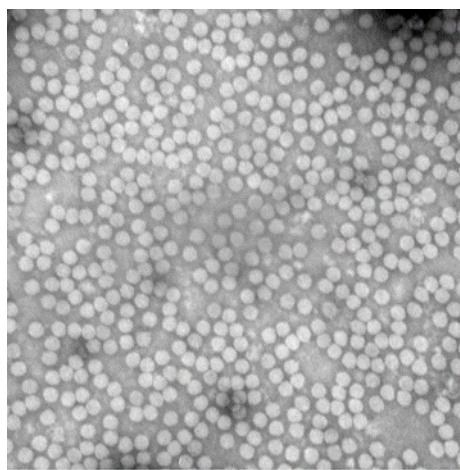

100 nm  
HV=75.0kV  
Direct Mag: 100000x  
AMT Camera System

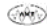

**Supplementary Figure 2**

**(a) O PA2-C3d nucleotide sequence**

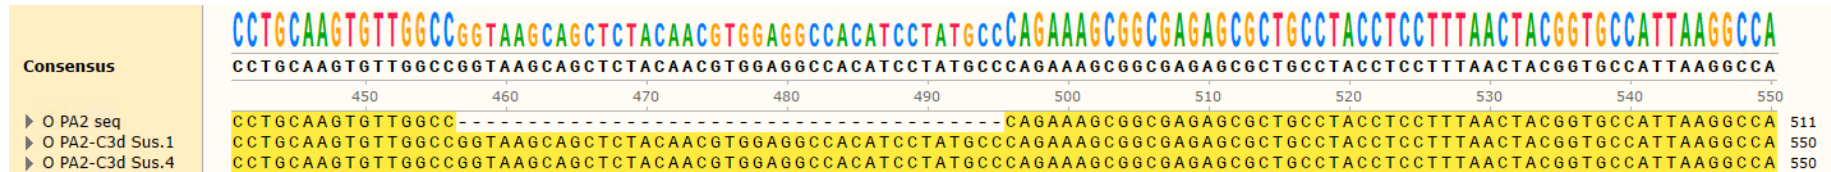

**(b) A22-C3d nucleotide sequence**

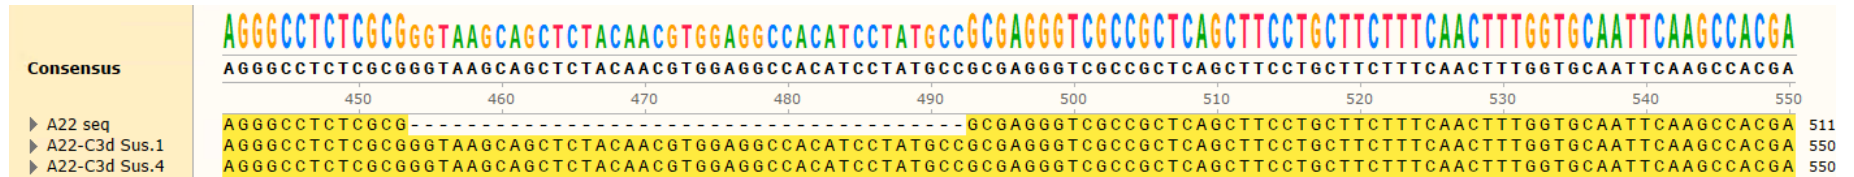

**(c) O PA2-C3d amino acid sequence**

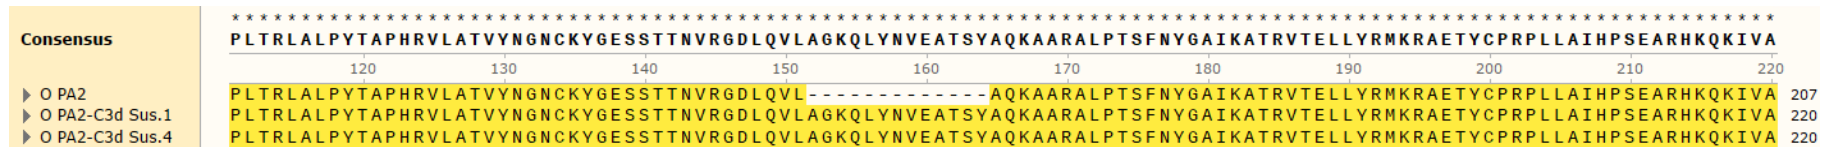

**(d) A22-C3d amino acid sequence**

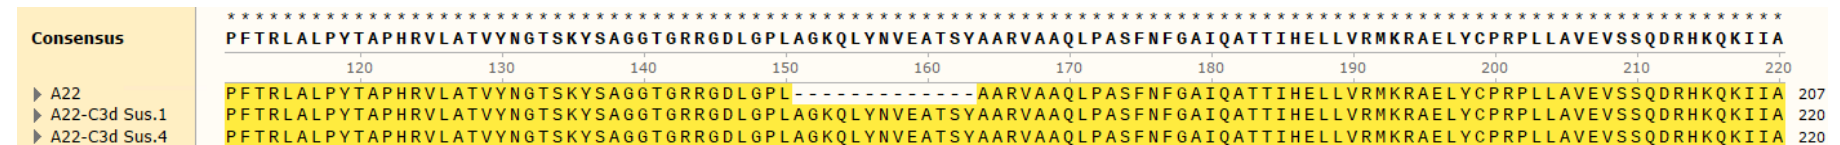

**Supplementary Figure 3**



**(a) IFN $\gamma$  secreting cell spot and SFU in murine PECs**

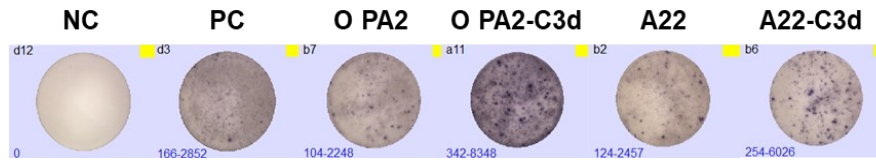

**IFN $\gamma$  secretion in murine PECs**

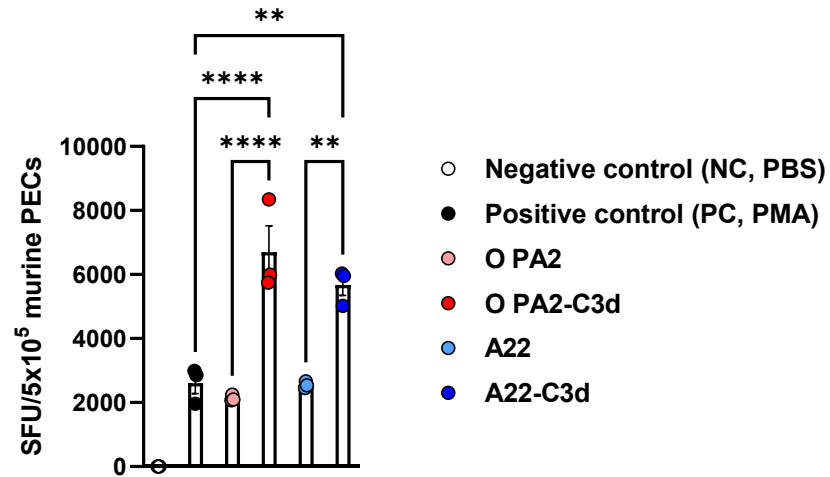

**(b) IFN $\gamma$  secreting cell spot and SFU in porcine PBMCs**

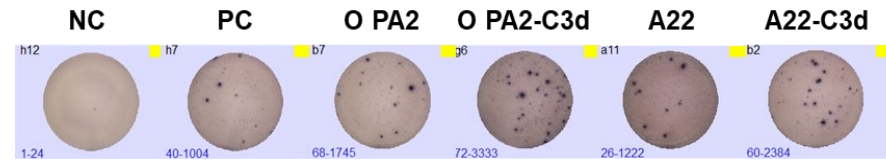

**IFN $\gamma$  secretion in porcine PBMCs**

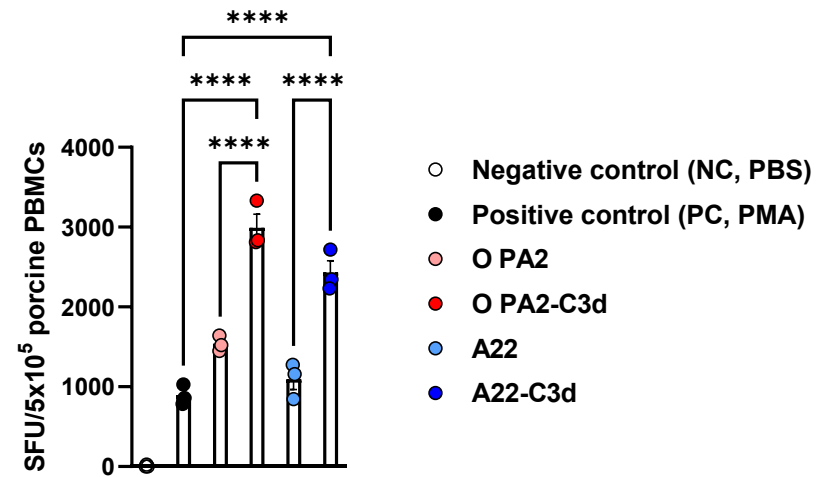

**Supplementary Figure 4**
