# Supplementary material for: The C3d-fused foot-and-mouth disease vaccine platform overcomes maternally-derived antibody interference by inducing a potent adaptive immunity
Source: PubMed Central journal article supplement (PMC9240001; doi:10.1038/s41541-022-00496-8), 2022-06-28
Supplement: 41541_2022_496_MOESM2_ESM.pdf [file 41541_2022_496_MOESM2_ESM.pdf]

## Reporting Summary

Nature Research wishes to improve the reproducibility of the work that we publish. This form provides structure for consistency and transparency in reporting. For further information on Nature Research policies, see our [Editorial Policies](#) and the [Editorial Policy Checklist](#).

### Statistics

For all statistical analyses, confirm that the following items are present in the figure legend, table legend, main text, or Methods section.

n/a Confirmed

- The exact sample size ( $n$ ) for each experimental group/condition, given as a discrete number and unit of measurement
- A statement on whether measurements were taken from distinct samples or whether the same sample was measured repeatedly
- The statistical test(s) used AND whether they are one- or two-sided  
*Only common tests should be described solely by name; describe more complex techniques in the Methods section.*
- A description of all covariates tested
- A description of any assumptions or corrections, such as tests of normality and adjustment for multiple comparisons
- A full description of the statistical parameters including central tendency (e.g. means) or other basic estimates (e.g. regression coefficient) AND variation (e.g. standard deviation) or associated estimates of uncertainty (e.g. confidence intervals)
- For null hypothesis testing, the test statistic (e.g.  $F$ ,  $t$ ,  $r$ ) with confidence intervals, effect sizes, degrees of freedom and  $P$  value noted  
*Give  $P$  values as exact values whenever suitable.*
- For Bayesian analysis, information on the choice of priors and Markov chain Monte Carlo settings
- For hierarchical and complex designs, identification of the appropriate level for tests and full reporting of outcomes
- Estimates of effect sizes (e.g. Cohen's  $d$ , Pearson's  $r$ ), indicating how they were calculated

*Our web collection on [statistics for biologists](#) contains articles on many of the points above.*

### Software and code

Policy information about [availability of computer code](#)

Data collection

Data analysis

For manuscripts utilizing custom algorithms or software that are central to the research but not yet described in published literature, software must be made available to editors and reviewers. We strongly encourage code deposition in a community repository (e.g. GitHub). See the Nature Research [guidelines for submitting code & software](#) for further information.

### Data

Policy information about [availability of data](#)

All manuscripts must include a [data availability statement](#). This statement should provide the following information, where applicable:

- Accession codes, unique identifiers, or web links for publicly available datasets
- A list of figures that have associated raw data
- A description of any restrictions on data availability

All data generated or analyzed during this study are included in this published article (and its supplementary information files).

The authors declare that all other data supporting the findings of this study are available within the article and its Supplementary Information files, or are available from the authors upon request.

## Field-specific reporting

Please select the one below that is the best fit for your research. If you are not sure, read the appropriate sections before making your selection.

Life sciences       Behavioural & social sciences       Ecological, evolutionary & environmental sciences

For a reference copy of the document with all sections, see [nature.com/documents/nr-reporting-summary-flat.pdf](https://www.nature.com/documents/nr-reporting-summary-flat.pdf)

## Life sciences study design

All studies must disclose on these points even when the disclosure is negative.

|                 |                                                                                                                   |
|-----------------|-------------------------------------------------------------------------------------------------------------------|
| Sample size     | All assays were repeated as multiple independent experiments as stated in the individual figure legends.          |
| Data exclusions | No data were excluded.                                                                                            |
| Replication     | All experiments were repeated multiple times as stated in the in the individual figure legends.                   |
| Randomization   | Mice and pigs were age and gender matched; they were randomized and distributed equally into experimental groups. |
| Blinding        | No blinding was used. There were no subjective measurements requiring blinded analysis.                           |

## Reporting for specific materials, systems and methods

We require information from authors about some types of materials, experimental systems and methods used in many studies. Here, indicate whether each material, system or method listed is relevant to your study. If you are not sure if a list item applies to your research, read the appropriate section before selecting a response.

### Materials & experimental systems

| n/a                                 | Involvement in the study                                        |
|-------------------------------------|-----------------------------------------------------------------|
| <input type="checkbox"/>            | <input checked="" type="checkbox"/> Antibodies                  |
| <input type="checkbox"/>            | <input checked="" type="checkbox"/> Eukaryotic cell lines       |
| <input checked="" type="checkbox"/> | <input type="checkbox"/> Palaeontology and archaeology          |
| <input type="checkbox"/>            | <input checked="" type="checkbox"/> Animals and other organisms |
| <input checked="" type="checkbox"/> | <input type="checkbox"/> Human research participants            |
| <input checked="" type="checkbox"/> | <input type="checkbox"/> Clinical data                          |
| <input checked="" type="checkbox"/> | <input type="checkbox"/> Dual use research of concern           |

### Methods

| n/a                                 | Involvement in the study                        |
|-------------------------------------|-------------------------------------------------|
| <input checked="" type="checkbox"/> | <input type="checkbox"/> ChIP-seq               |
| <input checked="" type="checkbox"/> | <input type="checkbox"/> Flow cytometry         |
| <input checked="" type="checkbox"/> | <input type="checkbox"/> MRI-based neuroimaging |

## Antibodies

|                 |                                       |
|-----------------|---------------------------------------|
| Antibodies used | See method section of the manuscript. |
| Validation      | See method section of the manuscript. |

## Eukaryotic cell lines

Policy information about [cell lines](#)

|                                                                      |                                                               |
|----------------------------------------------------------------------|---------------------------------------------------------------|
| Cell line source(s)                                                  | See method section of the manuscript.                         |
| Authentication                                                       | No authentication of cell lines was conducted.                |
| Mycoplasma contamination                                             | All the cell lines were confirmed as mycoplasma free.         |
| Commonly misidentified lines<br>(See <a href="#">ICLAC</a> register) | None of the cell lines used are listed in the ICLAC database. |

## Animals and other organisms

Policy information about [studies involving animals](#); [ARRIVE guidelines](#) recommended for reporting animal research

|                    |                                                                                                                                  |
|--------------------|----------------------------------------------------------------------------------------------------------------------------------|
| Laboratory animals | C57BL/6N mice (n=5/group) and Landrace pigs (n=3/group for PBMCs isolation; 4 or 6/group for the evaluation of vaccine efficacy) |
|--------------------|----------------------------------------------------------------------------------------------------------------------------------|

|                         |                                                                                                                                                                                                                                                                                   |
|-------------------------|-----------------------------------------------------------------------------------------------------------------------------------------------------------------------------------------------------------------------------------------------------------------------------------|
| Laboratory animals      | experiment) were used. For most of experiments, 6-7-weeks old female mice and 8-9-weeks old female pigs were used unless otherwise noted.                                                                                                                                         |
| Wild animals            | No wild animals were used in this study.                                                                                                                                                                                                                                          |
| Field-collected samples | 8-9-weeks old female Landrace pigs were used in field study. The pigs were divided into each groups (n=4 or 6/group). The animals were kept in a contaminant-free space during the study. Porcine PBMC for this study were purified from the whole blood of each pig (n=3/group). |
| Ethics oversight        | All animal experiments were performed according to institutional guidelines with approval from the Ethics Committee of Animal and Plant Quarantine Agency (Accreditation number IACUC-2021-584).                                                                                  |

Note that full information on the approval of the study protocol must also be provided in the manuscript.
